# Supplementary material
Source: PubMed Central journal article supplement (PMC4407736)
Supplement: supp_mol.115.097782_Supplemental_97782.pdf [file supp_mol.115.097782_Supplemental_97782.pdf]

**Molecular Pharmacology**  
**Supplemental Information**

**CINPA1 Is an Inhibitor of Constitutive Androstane Receptor (CAR) that Does Not  
Activate Pregnane X Receptor (PXR)**

Milu T Cherian, Wenwei Lin, Jing Wu, and Taosheng Chen

From the Department of Chemical Biology and Therapeutics, St. Jude Children's Research  
Hospital, Memphis, Tennessee 38105

## Supplemental Figure 1

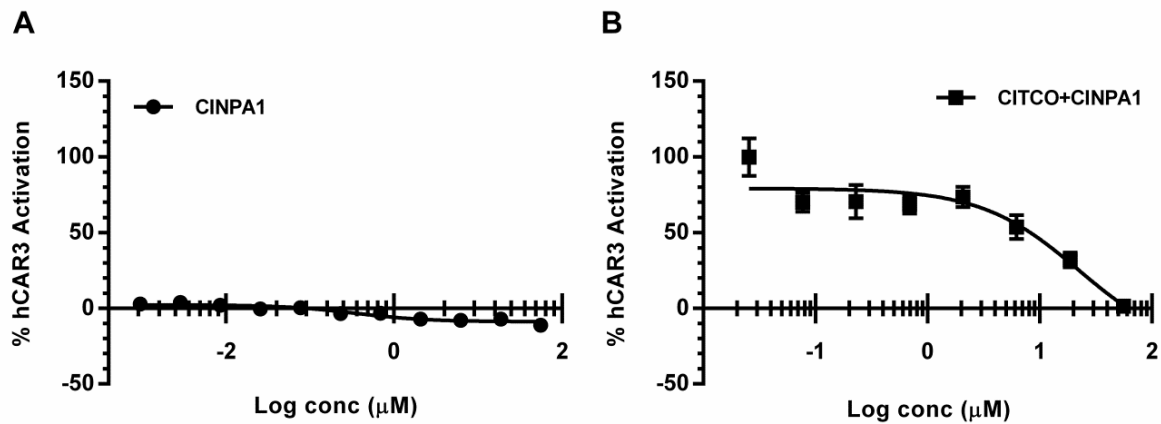

### Supplemental Figure 1. CINPA1 acts as a weak antagonist of the hCAR3 isoform.

An hCAR3 expression construct was generated by inserting 5 amino acids (APYLT) at position 271 in the pcDNA-FLAG-hCAR1 plasmid. HepG2 cells were transfected with plasmids expressing hCAR3, RXR $\alpha$  and CYP2B6-luc reporter. After 24 h incubation, cells were treated with indicated concentrations of CINPA1, in the absence (A) or presence (B) of 2  $\mu\text{M}$  CITCO. DMSO, 50  $\mu\text{M}$  PK11195, or 2  $\mu\text{M}$  CITCO was used as controls. Luciferase activity was measured 24 h after treatment by using SteadyLite reagent (PerkinElmer). A. Activity in DMSO-treated samples was set as 0% activation; activity in samples treated with 2  $\mu\text{M}$  CITCO was set as 100% activation. B. Activity in samples treated with 50  $\mu\text{M}$  PK11195 was set as 0% CAR activation and samples treated with 2  $\mu\text{M}$  CITCO was set as 100% activation. GraphPad Prism was used to fit the data into a dose-response stimulation equation to derive  $\text{IC}_{50}$  values. CINPA1 inhibits hCAR3 with an  $\text{IC}_{50}$  of 18  $\mu\text{M}$  and shows no agonistic effect on hCAR3 activation.

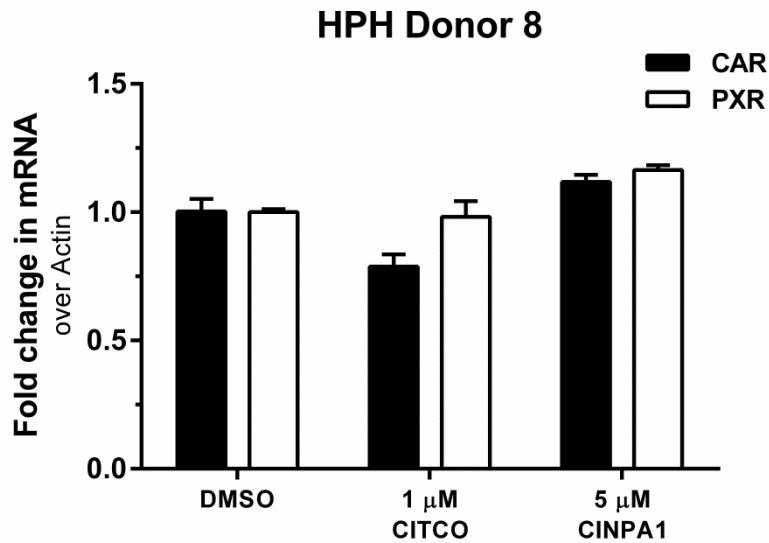

**Supplemental Figure 2. CINPA1 does not alter CAR or PXR mRNA levels in human hepatocytes.**

Human primary hepatocytes (Donor 8) were treated with DMSO, 1 μM CITCO, or 5 μM CINPA1 for 48 h. RNA was extracted and used for cDNA synthesis, followed by quantitative real-time PCR assays with Taqman probes. β-actin was used as the internal control. No significant change was observed in CINPA1 treated hepatocytes when compared to DMSO treated samples.

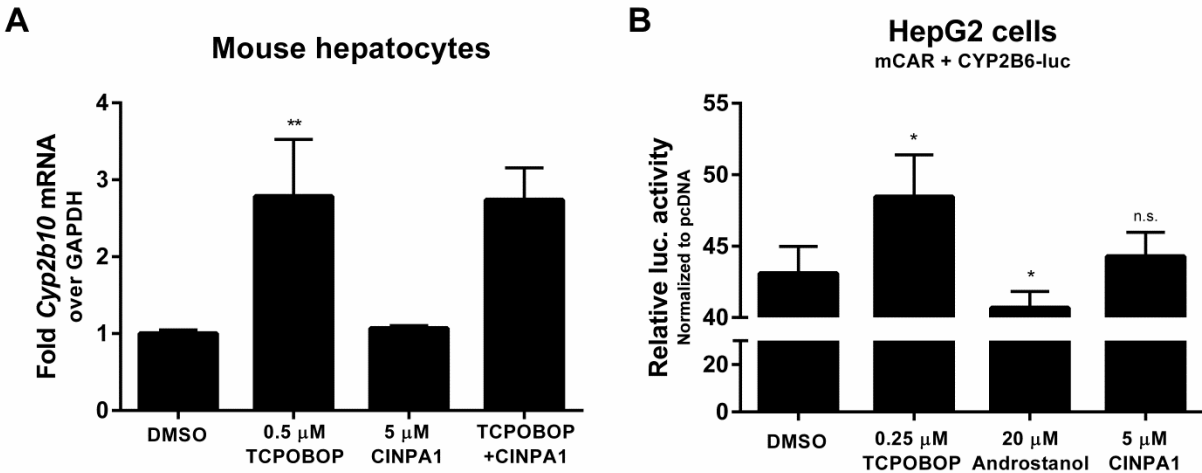

### Supplemental Figure 3. CINPA1 does not affect mouse CAR.

A. Mouse hepatocytes were isolated from C57Bl/6 mouse liver (TRL Cat # MBF06OL or MBFS1M; Triangle Research Labs, LLC, Research Triangle Park, NC) and plated in 6-well plates in Hepatocyte Maintenance Medium (TRL Cat # MM250). Cells were treated with DMSO, 0.5  $\mu$ M TCPOBOP (mouse CAR agonist), 5  $\mu$ M CINPA1, or 0.5  $\mu$ M TCPOBOP + 5  $\mu$ M CINPA1 for 24 h. RNA was extracted and used for cDNA synthesis, followed by performing quantitative real-time PCR assays with mouse-specific Taqman probes. GAPDH was used as the internal control. Statistical analysis was performed using one-way ANOVA for multiple comparisons and \*\*,  $p < 0.01$ . While TCPOBOP significantly induced Cyp2b10 mRNA, no significant change was detected with 5  $\mu$ M CINPA1 treatment on basal (DMSO) or TCPOBOP-induced Cyp2b10. B. Plasmids expressing CYP2B6-luc reporter and pTK-Renilla-luciferase were cotransfected with pcDNA (control plasmid) or pCR3-mCAR [kind gift from Dr. Hongbing Wang, (Li et al., 2008)] in HepG2 cells. After 24 h incubation, cells were treated with DMSO, 0.25  $\mu$ M TCPOBOP (mCAR agonist), 20  $\mu$ M androstanol, or 5  $\mu$ M CINPA1. Luciferase activity was measured 24 h after treatment by using Dual-Glo luciferase reagents (Promega, Madison, WI). Relative luciferase activity was calculated as the firefly to renilla luciferase ratio for each treatment condition and normalized to pcDNA (control plasmid) transfected samples. \*,  $p < 0.05$ . CINPA1 does not inhibit mCAR function in these assays.

### Reference:

Li L, Chen T, Stanton JD, Sueyoshi T, Negishi M and Wang H (2008) The peripheral benzodiazepine receptor ligand 1-(2-chlorophenyl-methylpropyl)-3-isoquinoline-carboxamide is a novel antagonist of human constitutive androstane receptor. *Mol Pharmacol* **74**(2): 443-453.
